# Supplementary material for: Guanidiniocarbonyl-pyrrole-aryl conjugates as nucleic acid sensors: switch of binding mode and spectroscopic responses by introducing additional binding sites into the linker
Source: Royal Society of Chemistry journal article supplement (doi:10.1039/c0ob00103a), 2010-11-15
Supplement: c0ob00103a.pdf [file c0ob00103a.pdf]

## Supporting Information to:

### Guanidiniocarbonyl-pyrrole-aryl conjugates as nucleic acid sensors: switch of binding mode and spectroscopic responses by introducing additional binding sites into the linker.

Kathrin Gröger,<sup>a</sup> Domagoj Baretic,<sup>b</sup> Ivo Piantanida,<sup>b\*</sup> Marko Marjanović,<sup>c</sup> Marijeta Kralj,<sup>c</sup> Marina Grabar,<sup>d</sup> Sanja Tomić,<sup>d</sup> Carsten Schmuck<sup>a\*</sup>

CD spectra:

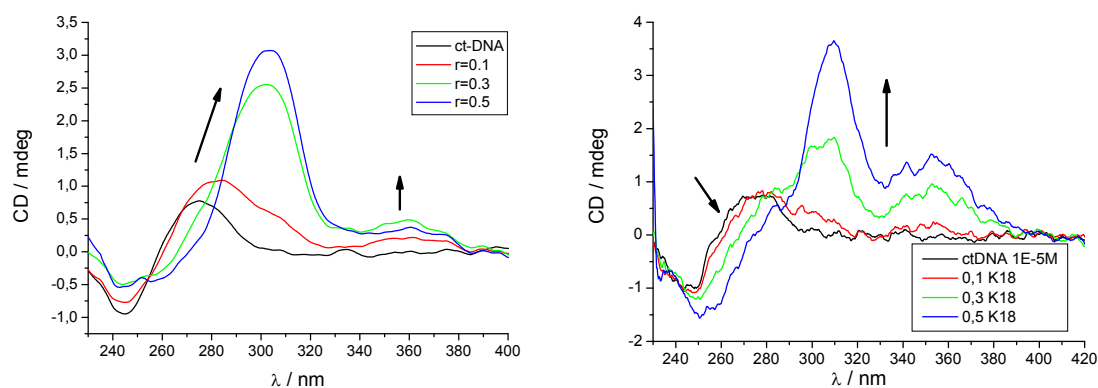

Figure S1 CD titrations of ct-DNA with **3** (left) and **4** (right) at pH 5 (sodium citrate buffer,  $I = 0.03 \text{ mol dm}^{-3}$ ).
